# Supplementary material
Source: Springer Nature journal article supplement (https://www.springermedizin.de/resource/supplementary/12874_2011_654_MOESM7_ESM.pdf/9432334)
Supplement: MOESM7 [file 9432334]

# Conditional Probabilities of Fracture\_skull

| Parents              | Probability |       |
|----------------------|-------------|-------|
| Intracranial_lesions | 1           | 0     |
| 1                    | 0.148       | 0.851 |
| 0                    | 0.012       | 0.987 |
